# Supplementary material
Source: Springer Nature journal article supplement (https://www.springermedizin.de/resource/supplementary/12985_2011_1520_MOESM1_ESM.pdf/9609972)

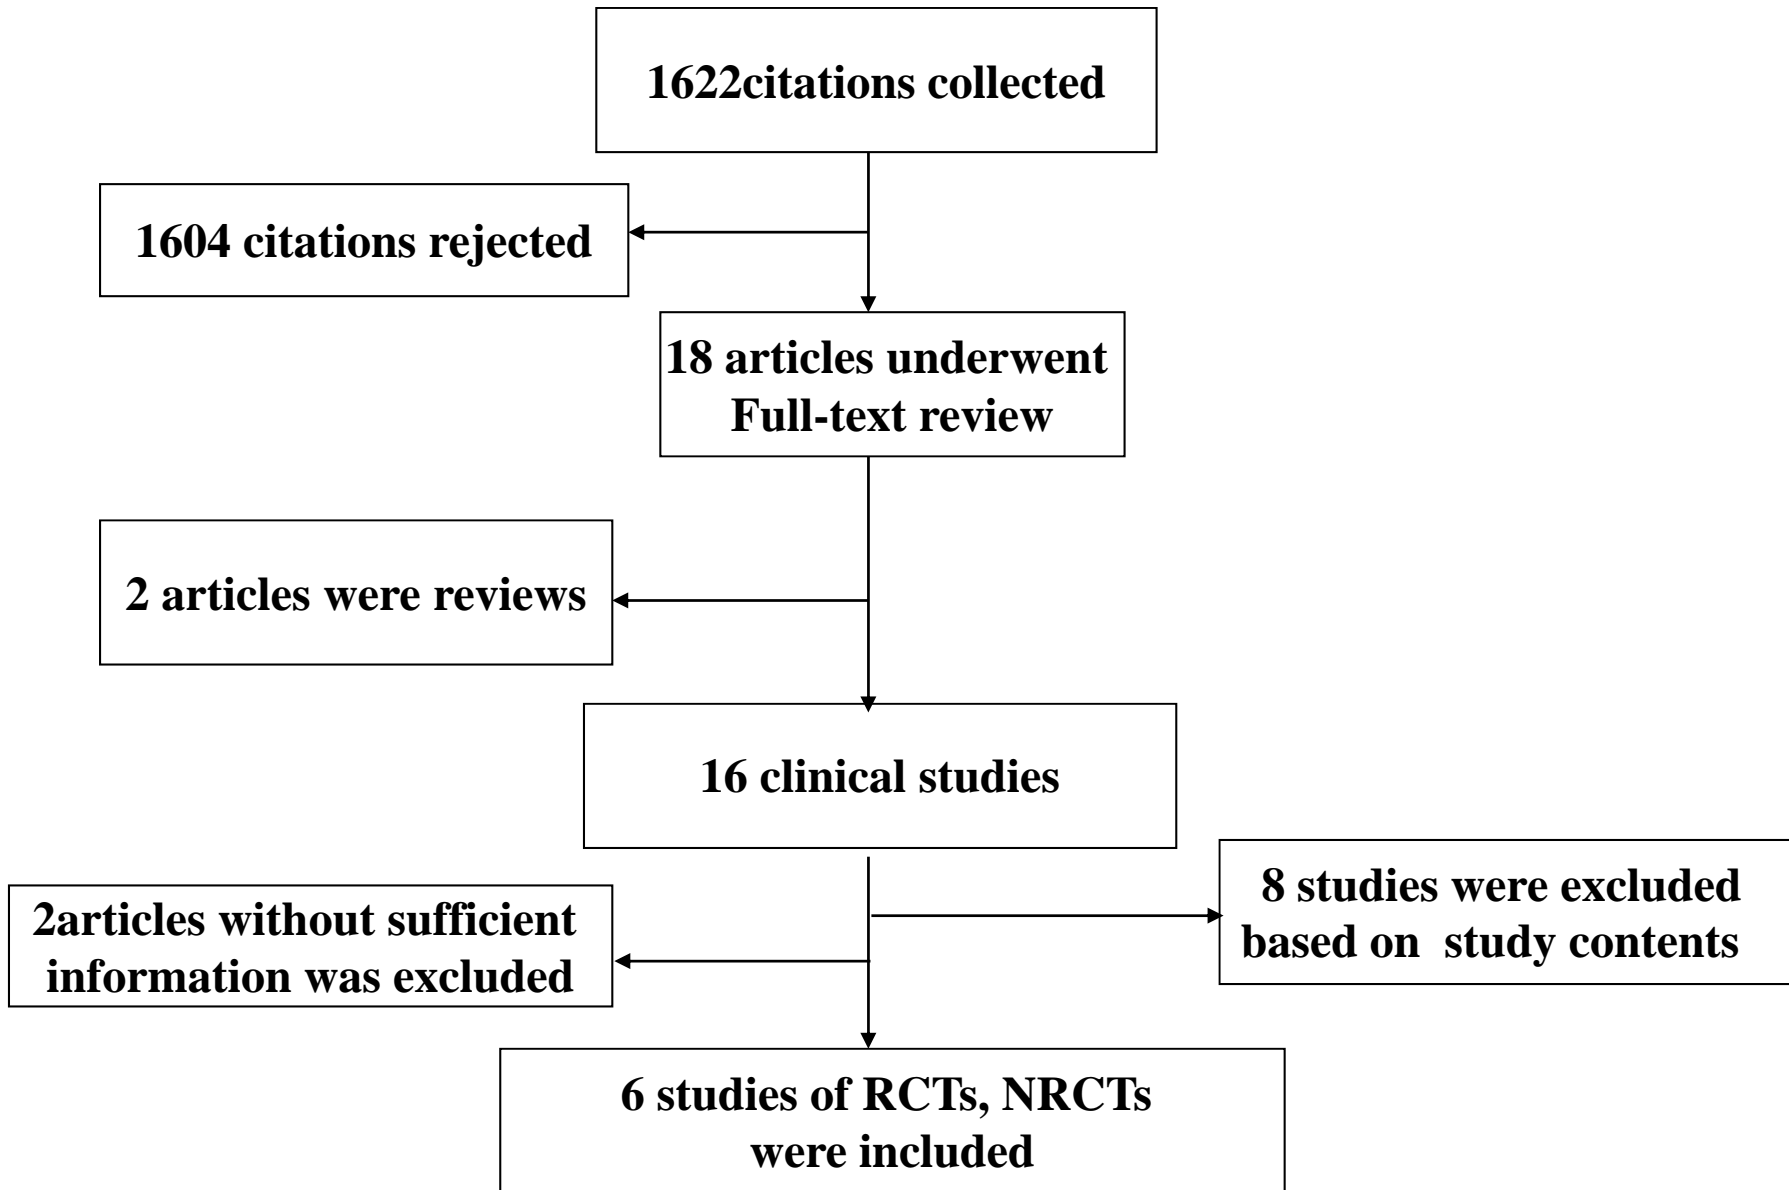

Supplement: MOESM1 [file 9609972]
